# Supplementary material
Source: PubMed Central journal article supplement (PMC8058483)
Supplement: mmc1.pdf [file mmc1.pdf]

## Supplemental Information

**Corticosteroids and cellulose purification  
improve, respectively, the *in vivo* translation  
and vaccination efficacy of sa-mRNAs**

**Zifu Zhong, Séan McCafferty, Lisa Opsomer, Haixiu Wang, Hanne Huysmans, Joyca De Temmerman, Stefan Lienenklaus, João Paulo Portela Catani, Francis Combes, and Niek N. Sanders**

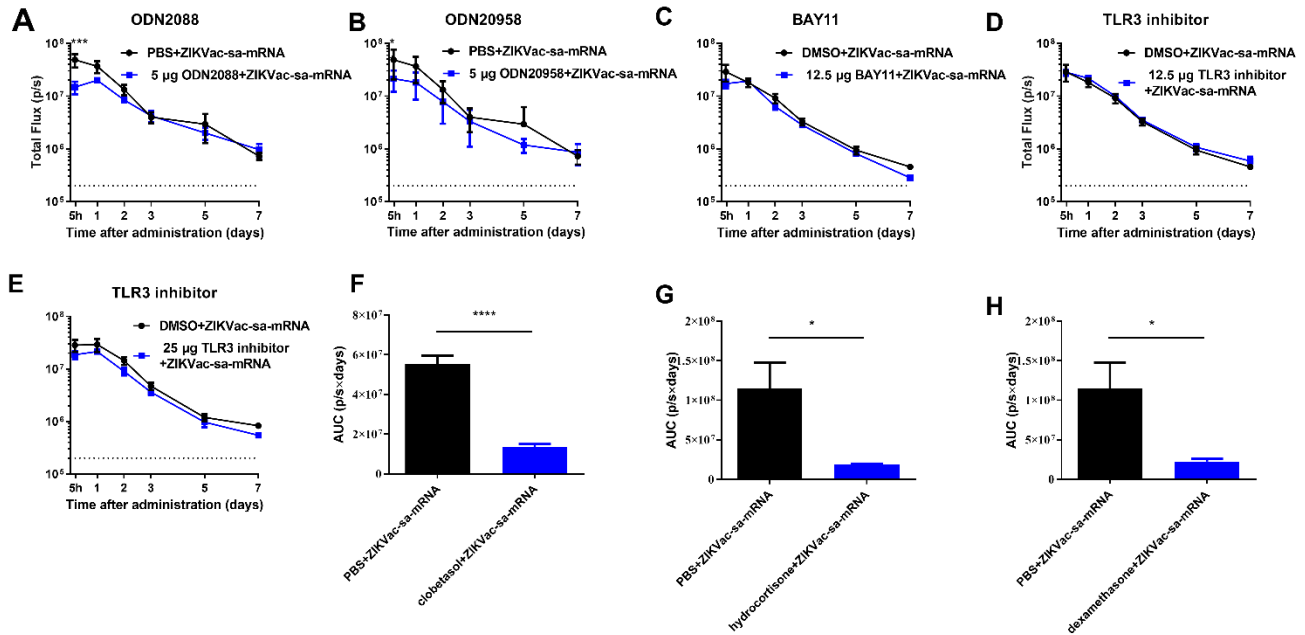

**Figure S1. Effect of the TLR3 inhibitor and lower doses of ODN2088, ODN20958 and BAY11 on the type I IFN response after intradermal electroporation of ZIKVac-sa-mRNA in IFN- $\beta^{+/\Delta\beta}$ -luc reporter mice.** The effects of 5  $\mu$ g ODN2088 (A), 5  $\mu$ g ODN20958 (B), 12.5  $\mu$ g BAY11 (C), 12.5  $\mu$ g and 25  $\mu$ g TLR3 inhibitor (D-E) on the type I IFN response of intradermally electroporated ZIKVac-sa-mRNA (1  $\mu$ g). These inhibitors were mixed with the ZIKVac-sa-mRNA upon administration. (n = 4, data are shown as means  $\pm$  SEM). In addition, the area under the curves (AUCs) of Fig. 2J-L are presented in (F-H).

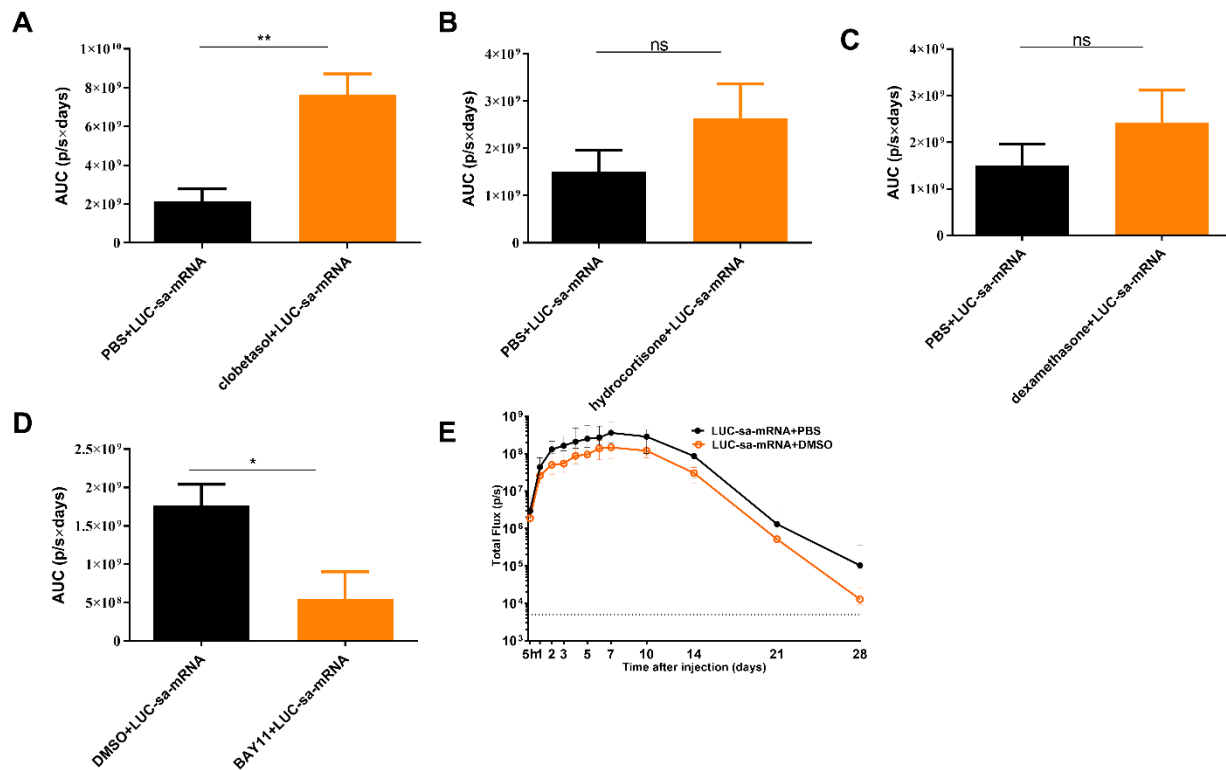

**Figure S2. The influence of innate immune inhibitors on the translation of LUC-sa-mRNA in BALB/c mice.** The area under the curves (AUCs) of Fig. 4B-E are presented in panels A-D, respectively. Each bar represents the mean of four individual mice and the error bars represent SEM. The luciferase expression was determined in BALB/c mice that were intradermally electroporated with 1  $\mu$ g of LUC-sa-mRNA with DMSO or PBS, each symbol represents the median of four individual mice and the error bars represent interquartile range (E).

**Table S1. Significant difference for Figure 5b and Figure 5d.**

*Significant difference for Figure 5b*

| <b>5 h</b>                          |                                     | <b>Sinificance</b> | <b>P value</b> |
|-------------------------------------|-------------------------------------|--------------------|----------------|
| silic ZIKVac-sa-mRNA+clobetasol     | cellulose ZIKVac-sa-mRNA+clobetasol | ns                 | 0.2241         |
| silic ZIKVac-sa-mRNA+clobetasol     | silic ZIKVac-sa-mRNA                | ****               | < 0.0001       |
| silic ZIKVac-sa-mRNA+clobetasol     | cellulose ZIKVac-sa-mRNA            | ns                 | > 0.9999       |
| cellulose ZIKVac-sa-mRNA+clobetasol | silic ZIKVac-sa-mRNA                | ****               | < 0.0001       |
| cellulose ZIKVac-sa-mRNA+clobetasol | cellulose ZIKVac-sa-mRNA            | ns                 | 0.7716         |
| silic ZIKVac-sa-mRNA                | cellulose ZIKVac-sa-mRNA            | ****               | < 0.0001       |
| <b>1 day</b>                        |                                     | <b>Sinificance</b> | <b>P value</b> |
| silic ZIKVac-sa-mRNA+clobetasol     | cellulose ZIKVac-sa-mRNA+clobetasol | ns                 | > 0.9999       |
| silic ZIKVac-sa-mRNA+clobetasol     | silic ZIKVac-sa-mRNA                | ****               | < 0.0001       |
| silic ZIKVac-sa-mRNA+clobetasol     | cellulose ZIKVac-sa-mRNA            | ns                 | > 0.9999       |
| cellulose ZIKVac-sa-mRNA+clobetasol | silic ZIKVac-sa-mRNA                | ****               | < 0.0001       |
| cellulose ZIKVac-sa-mRNA+clobetasol | cellulose ZIKVac-sa-mRNA            | ns                 | > 0.9999       |
| silic ZIKVac-sa-mRNA                | cellulose ZIKVac-sa-mRNA            | ****               | < 0.0001       |

*Significant difference for Figure 5d*

|                                    |                                    | <b>Sinificance</b> | <b>P value</b> |
|------------------------------------|------------------------------------|--------------------|----------------|
| <b>2 days</b>                      |                                    |                    |                |
| silic LUC-sa-mRNA + clobetasol     | cellulose LUC-sa-mRNA + clobetasol | ns                 | > 0.9999       |
| silic LUC-sa-mRNA + clobetasol     | silic LUC-sa-mRNA                  | ****               | < 0.0001       |
| silic LUC-sa-mRNA + clobetasol     | cellulose LUC-sa-mRNA              | ****               | < 0.0001       |
| cellulose LUC-sa-mRNA + clobetasol | silic LUC-sa-mRNA                  | ****               | < 0.0001       |
| cellulose LUC-sa-mRNA + clobetasol | cellulose LUC-sa-mRNA              | ***                | 0.0003         |
| silic LUC-sa-mRNA                  | cellulose LUC-sa-mRNA              | ns                 | > 0.9999       |
| <b>3 days</b>                      |                                    |                    |                |
| silic LUC-sa-mRNA + clobetasol     | cellulose LUC-sa-mRNA + clobetasol | **                 | 0.0093         |
| silic LUC-sa-mRNA + clobetasol     | silic LUC-sa-mRNA                  | ***                | 0.0001         |
| silic LUC-sa-mRNA + clobetasol     | cellulose LUC-sa-mRNA              | ns                 | 0.0958         |
| cellulose LUC-sa-mRNA + clobetasol | silic LUC-sa-mRNA                  | ****               | < 0.0001       |
| cellulose LUC-sa-mRNA + clobetasol | cellulose LUC-sa-mRNA              | ****               | < 0.0001       |
| silic LUC-sa-mRNA                  | cellulose LUC-sa-mRNA              | ns                 | 0.9991         |
| <b>4 days</b>                      |                                    |                    |                |
| silic LUC-sa-mRNA + clobetasol     | cellulose LUC-sa-mRNA + clobetasol | **                 | 0.0081         |
| silic LUC-sa-mRNA + clobetasol     | silic LUC-sa-mRNA                  | ***                | 0.0001         |
| silic LUC-sa-mRNA + clobetasol     | cellulose LUC-sa-mRNA              | *                  | 0.0235         |
| cellulose LUC-sa-mRNA + clobetasol | silic LUC-sa-mRNA                  | ****               | < 0.0001       |
| cellulose LUC-sa-mRNA + clobetasol | cellulose LUC-sa-mRNA              | ****               | < 0.0001       |
| silic LUC-sa-mRNA                  | cellulose LUC-sa-mRNA              | ns                 | > 0.9999       |
| <b>5 days</b>                      |                                    |                    |                |
| silic LUC-sa-mRNA + clobetasol     | cellulose LUC-sa-mRNA + clobetasol | **                 | 0.0015         |
| silic LUC-sa-mRNA + clobetasol     | silic LUC-sa-mRNA                  | ns                 | 0.3438         |
| silic LUC-sa-mRNA + clobetasol     | cellulose LUC-sa-mRNA              | ns                 | > 0.9999       |
| cellulose LUC-sa-mRNA + clobetasol | silic LUC-sa-mRNA                  | ****               | < 0.0001       |
| cellulose LUC-sa-mRNA + clobetasol | cellulose LUC-sa-mRNA              | ****               | < 0.0001       |
| Silic LUC-sa-mRNA                  | cellulose LUC-sa-mRNA              | ns                 | > 0.9999       |
| <b>6 days</b>                      |                                    |                    |                |
| silic LUC-sa-mRNA + clobetasol     | cellulose LUC-sa-mRNA + clobetasol | ns                 | 0.7251         |
| silic LUC-sa-mRNA + clobetasol     | silic LUC-sa-mRNA                  | ns                 | 0.6574         |
| silic LUC-sa-mRNA + clobetasol     | cellulose LUC-sa-mRNA              | ns                 | > 0.9999       |
| cellulose LUC-sa-mRNA + clobetasol | silic LUC-sa-mRNA                  | ***                | 0.0001         |
| cellulose LUC-sa-mRNA + clobetasol | cellulose LUC-sa-mRNA              | *                  | 0.0205         |
| silic LUC-sa-mRNA                  | cellulose LUC-sa-mRNA              | ns                 | > 0.9999       |
| <b>7 days</b>                      |                                    |                    |                |
| silic LUC-sa-mRNA + clobetasol     | cellulose LUC-sa-mRNA + clobetasol | **                 | 0.0087         |
| silic LUC-sa-mRNA + clobetasol     | silic LUC-sa-mRNA                  | ns                 | > 0.9999       |
| silic LUC-sa-mRNA + clobetasol     | cellulose LUC-sa-mRNA              | ns                 | > 0.9999       |

|                                    |                                    |                     |                |
|------------------------------------|------------------------------------|---------------------|----------------|
| cellulose LUC-sa-mRNA + clobetasol | silic LUC-sa-mRNA                  | ****                | < 0.0001       |
| cellulose LUC-sa-mRNA + clobetasol | cellulose LUC-sa-mRNA              | ****                | < 0.0001       |
| silic LUC-sa-mRNA                  | cellulose LUC-sa-mRNA              | ns                  | > 0.9999       |
| <b>14 days</b>                     |                                    | <b>Significance</b> | <b>P value</b> |
| silic LUC-sa-mRNA + clobetasol     | cellulose LUC-sa-mRNA + clobetasol | ns                  | 0.9238         |
| silic LUC-sa-mRNA + clobetasol     | silic LUC-sa-mRNA                  | ns                  | 0.6629         |
| silic LUC-sa-mRNA + clobetasol     | cellulose LUC-sa-mRNA              | ns                  | 0.3951         |
| cellulose LUC-sa-mRNA + clobetasol | silic LUC-sa-mRNA                  | ***                 | 0.0005         |
| cellulose LUC-sa-mRNA + clobetasol | cellulose LUC-sa-mRNA              | ***                 | 0.0001         |
| silic LUC-sa-mRNA                  | cellulose LUC-sa-mRNA              | ns                  | > 0.9999       |
